# Supplementary material
Source: PubMed Central journal article supplement (PMC5912344)
Supplement: NIHMS953597-supplement-Supplemental_Material.pdf [file NIHMS953597-supplement-Supplemental_Material.pdf]

## **SUPPLEMENTAL MATERIAL**

**Supplemental Table 1: Propensity Matched Cohort**

|                                 | BTT with CF-LVAD<br>N=5944 | Medical Mgmt<br>N= 5944 | ASD%<br>(Before PSM) | ASD%<br>(After PSM) |
|---------------------------------|----------------------------|-------------------------|----------------------|---------------------|
| <b>Clinical Characteristics</b> |                            |                         |                      |                     |
| Age                             | 53.1 ± 12.3                | 52.8 ± 12.2             | 0.36                 | 2.9                 |
| Male Gender                     | 4569 (76.9%)               | 4551 (76.6%)            | 17.9                 | 0.72                |
| Ethnicity                       |                            |                         | 13.0                 | 1.0                 |
| White                           | 3943 (66.3%)               | 3968 (66.8%)            |                      |                     |
| Black                           | 1361 (22.9%)               | 1340 (22.5%)            |                      |                     |
| Hispanic                        | 418 (7.0%)                 | 419 (7.0%)              |                      |                     |
| Other                           | 222 (3.7%)                 | 217 (3.7%)              |                      |                     |
| Diabetes                        | 1795 (30.2%)               | 1721 (29.0%)            | 10.3                 | 2.7                 |
| AICD                            | 4683 (78.8%)               | 4729 (79.6%)            | 2.9                  | 1.9                 |
| Smoking                         | 2973 (50.0%)               | 3047 (1.3%)             | 15.1                 | 2.5                 |
| Blood Type O                    | 2701 (45.4%)               | 2691 (45.3%)            | 16.9                 | 0.34                |
| BSA > 2.25                      | 1199 (20.2%)               | 1143 (9.2%)             | 20.1                 | 2.4                 |
| Heart Failure Diagnosis         |                            |                         | 42.9                 | 0.58                |
| Dilated Myopathy                | 5695 (95.8%)               | 5688 (95.7%)            |                      |                     |
| Non-Dilated Myopathy            | 249 (4.2%)                 | 256 (4.3%)              |                      |                     |
| UNOS status @ Listing           |                            |                         | 50.2                 | 1.8                 |
| Status 1A                       | 1548 (26.0%)               | 1505 (25.3%)            |                      |                     |
| Status 1B                       | 2859 (48.1%)               | 2871 (48.3%)            |                      |                     |
| Status 2                        | 1537 (25.9%)               | 1568 (26.4%)            |                      |                     |
| Functional Status               |                            |                         | 7.2                  | 2.4                 |
| Excellent                       | 1991 (33.5%)               | 2006 (33.8%)            |                      |                     |
| Moderate                        | 3133 (52.7%)               | 3167 (53.3%)            |                      |                     |
| Poor                            | 820 (13.8%)                | 771 (13.0%)             |                      |                     |
| Creatinine > 2.5                | 115 (1.9%)                 | 123 (2.1%)              | 0.96                 | 0.99                |
| UNOS Region                     |                            |                         | 32.6                 | 4.7                 |
| 1                               | 747 (12.6%)                | 715 (12.0%)             |                      |                     |
| 2                               | 331 (5.6%)                 | 336 (5.7%)              |                      |                     |
| 3                               | 658 (11.1%)                | 640 (10.8%)             |                      |                     |
| 4                               | 707 (11.9%)                | 713 (12.0%)             |                      |                     |
| 5                               | 660 (11.1%)                | 647 (10.9%)             |                      |                     |
| 6                               | 136 (2.3%)                 | 175 (2.9%)              |                      |                     |
| 7                               | 570 (9.6%)                 | 560 (9.4%)              |                      |                     |
| 8                               | 304 (5.1%)                 | 301 (5.1%)              |                      |                     |
| 9                               | 498 (8.4%)                 | 503 (8.5%)              |                      |                     |
| 10                              | 547 (9.2%)                 | 571 (9.6%)              |                      |                     |
| 11                              | 786 (13.2%)                | 783 (13.2%)             |                      |                     |

**Supplemental Table 2: Predictors of Death or Delisting and Transplantation**

| <b>Death or Delisting</b>    |                                       |                                       |
|------------------------------|---------------------------------------|---------------------------------------|
| Age > 60                     | 1.48 (1.36 – 1.62), p<0.001           | 1.56 (1.42 – 1.71), p<0.001           |
| Female Gender                | 1.16 (1.05 – 1.30), p=0.003           | 1.21 (1.09 – 1.34), p<0.001           |
| Diabetes                     | 1.27 (1.16 – 1.40), p<0.001           | 1.24 (1.13 – 1.37), p<0.001           |
| Smoking History              | 1.10 (1.01 – 1.20), p=0.036           | 1.11 (1.02 – 1.22), p=0.021           |
| Creatinine > 2.5             | 3.11 (2.52 – 3.85), p<0.001           | 2.43 (1.96 – 3.01), p<0.001           |
| AICD                         | 0.88 (0.80 – 0.99), p=0.030           | 1.02 (0.92 – 1.14), p=0.675           |
| Blood Type O                 | 0.90 (0.82 – 0.98), p=0.016           | 0.91 (0.83 – 0.99), p=0.048           |
| Non-Dilated Myopathy         | 1.36 (1.12 – 1.65), p=0.002           | 1.63 (1.34 – 1.99), p<0.001           |
| UNOS status @ Listing        | p<0.001                               | p<0.001                               |
| Status 1A                    | 2.26 (2.01 – 2.55)                    | 1.69 (1.48 – 1.94)                    |
| Status 1B                    | 1.20 (1.08 – 1.34)                    | 1.12 (1.00 – 1.25)                    |
| Status 2                     | (Reference)                           | (Reference)                           |
| Functional Status            | p<0.001                               | p<0.001                               |
| Excellent                    | (Reference)                           | (Reference)                           |
| Moderate                     | 1.20 (1.03 – 1.39)                    | 1.17 (1.00 – 1.36)                    |
| Poor                         | 2.42 (2.08 – 2.82)                    | 2.04 (1.74 – 2.40)                    |
| BTT                          | 0.92 (0.084 – 0.99), p=0.043          | 0.83 (0.76 – 0.92), p<0.001           |
| <b>Congruous Utilization</b> | <b>0.85 (0.76 – 0.95), p=0.003</b>    | <b>0.88 (0.79 – 0.99), p=0.027</b>    |
| <b>Transplantation</b>       |                                       |                                       |
| Female Gender                | 1.09 (1.04 – 1.15), p=0.001           | 0.97 (0.92 – 1.03), p=0.363           |
| Ethnicity                    | p<0.001                               | p<0.001                               |
| White                        | (Reference)                           | (Reference)                           |
| African American             | 0.91 (0.87 – 0.97)                    | 0.88 (0.83 – 0.93)                    |
| Hispanic                     | 1.05 (0.96 – 1.15)                    | 0.99 (0.91 – 1.08)                    |
| Other                        | 1.20 (1.06 – 1.35)                    | 1.06 (0.94 – 1.19)                    |
| Diabetes                     | 0.87 (0.82 – 0.91), p<0.001           | 0.90 (0.86 – 0.95), p<0.001           |
| Smoking History              | 0.93 (0.89 – 0.98), p=0.003           | 0.95 (0.90 – 0.99), p=0.037           |
| Blood Type O                 | 0.61 (0.58 – 0.63), p<0.001           | 0.60 (0.58 – 0.63), p<0.001           |
| BSA > 2.25                   | 0.60 (0.57 – 0.64), p<0.001           | 0.61 (0.58 – 0.66), p<0.001           |
| Non-Dilated Myopathy         | 0.89 (0.79 – 0.99), p=0.047           | 0.96 (0.85 – 1.09), p=0.525           |
| UNOS status @ Listing        | p<0.001                               | p<0.001                               |
| Status 1A                    | 3.20 (3.00 – 3.42)                    | 3.54 (3.29 – 3.81)                    |
| Status 1B                    | 1.96 (1.85 – 2.08)                    | 2.09 (1.97 – 2.22)                    |
| Status 2                     | (Reference)                           | (Reference)                           |
| Functional Status            | p<0.001                               |                                       |
| Excellent                    | (Reference)                           | (Reference)                           |
| Moderate                     | 1.16 (1.08 – 1.24)                    | 0.95 (0.88 – 1.03)                    |
| Poor                         | 1.46 (1.35 – 1.57)                    | 1.10 (1.02 – 1.18)                    |
| BTT                          | 0.78 (0.75 – 0.83), p<0.001           | 0.68 (0.65 – 0.71), p<0.001           |
| <b>Congruous Utilization</b> | <b>1.14 (1.08 – 1.22), p&lt;0.001</b> | <b>1.14 (1.07 – 1.21), p&lt;0.001</b> |

**Figure Legend:**

**Supplemental Figure 1.** Propensity Score Modeling for Ventricular Assist Device Utilization in Transplant Listed Patients (A) Distribution of VAD Likelihood Score (B) Congruous Utilization Algorithm.

**Supplemental Figure 2.** Nationwide Trends in Heart Transplantation Candidates (A) Trends in Ventricular Assist Device Utilization (B) Trends in Wait List Time

**Supplemental Figure 3.** Correlation between Wait List Time and Device Utilization (A) Overall Wait List Time (B) Days as Status 1A (C) Days as Status 1B (D) Days as Status 2

**Supplemental Figure 4.** Competing Outcomes Based Upon Bridging Strategy (A) Medical versus Mechanical Bridge (B) Congruous versus Incongruous Strategy
